# Supplementary material for: Enhancing Polysulfone Mixed-Matrix Membranes with Amine-Functionalized Graphene Oxide for Air Dehumidification and Water Treatment
Source: MDPI journal article supplement (doi:10.3390/membranes13070678), 2023-07-19
Supplement: s1 [file s1]

# Enhancing Polysulfone Mixed-Matrix Membranes with Amine-Functionalized Graphene Oxide for Air Dehumidification and Water Treatment

Omnya Abdalla <sup>1,2</sup>, Abdul Rehman <sup>1</sup>, Ahmed Nabeeh <sup>1</sup>, Md A. Wahab <sup>1</sup>, Ahmed Abdel-Wahab <sup>1</sup> and Ahmed Abdala <sup>1,\*</sup>

<sup>1</sup> Chemical Engineering Program, Texas A&M University at Qatar, Doha 23874, Qatar; omnya.abdalla@qatar.tamu.edu or o.abdalla@gord.qa (O.A.)

<sup>2</sup> Gulf Organisation for Research & Development (GORD), Qatar Science & Technology Park, Tech1 Bldg, Suite 203, Doha 210162, Qatar

\* Correspondence: ahmed.abdala@qatar.tamu.edu; Tel.: +974-4423-0180

**Table S1:** Elemental Analysis of GO and GO-NH<sub>2</sub> Obtained from XPS

| Sample             | Atomic % |       |      |
|--------------------|----------|-------|------|
|                    | %C       | %O    | %N   |
| GO                 | 63.15    | 36.85 | 0.00 |
| GO-NH <sub>2</sub> | 77.58    | 15.07 | 7.35 |

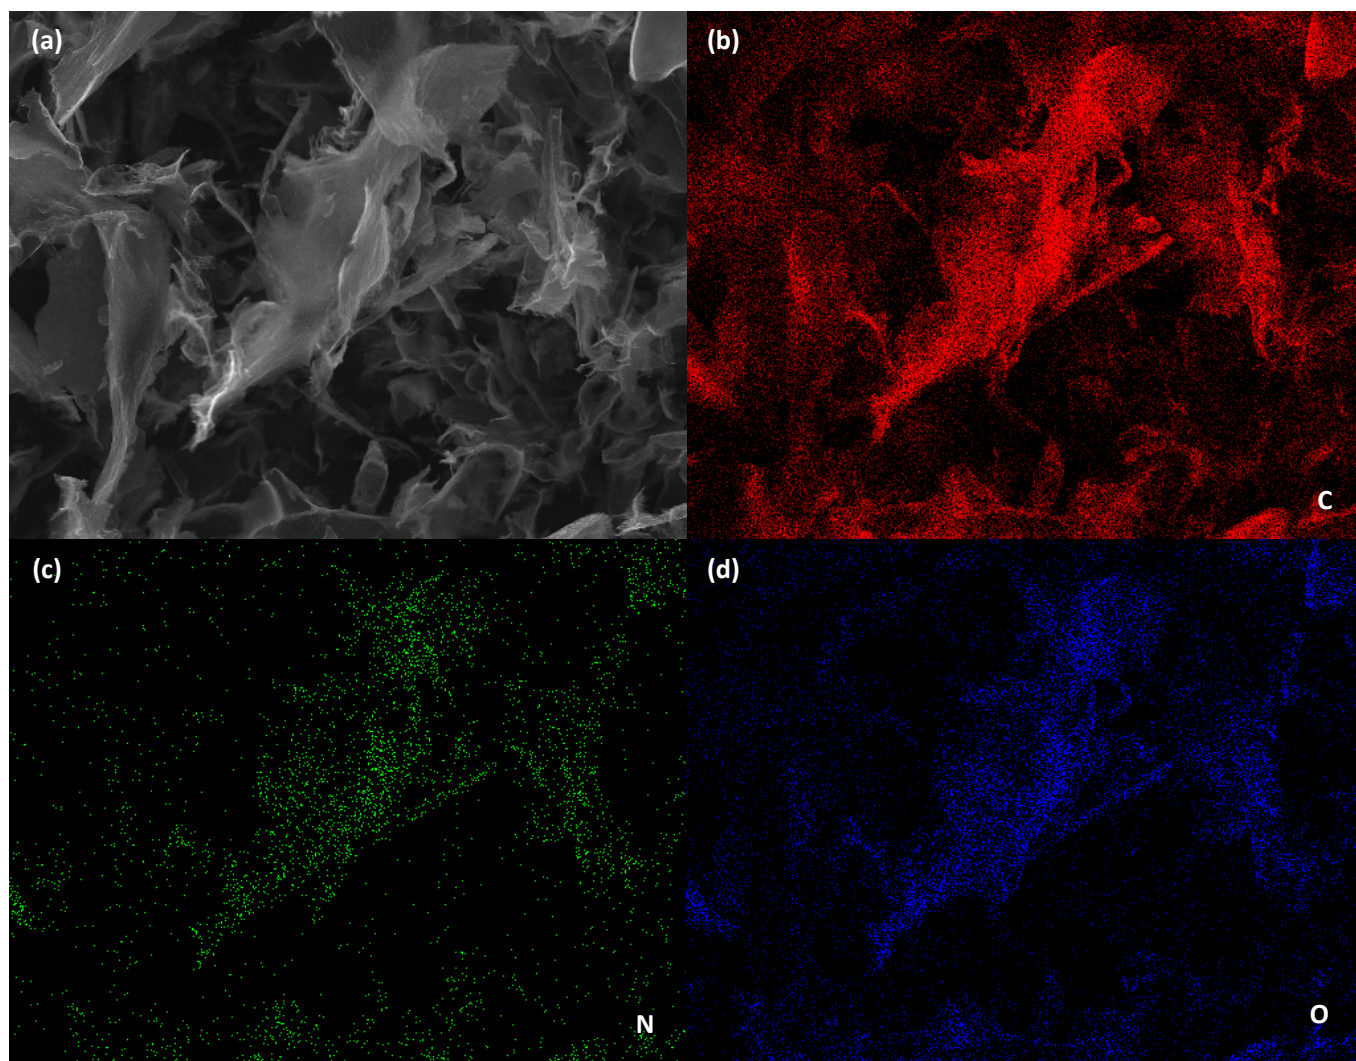

**Figure S1:** SEM of GO-NH<sub>2</sub> and EDS mapping of (b) carbon, (c) nitrogen, and (d) oxygen atoms of GO-NH<sub>2</sub>.

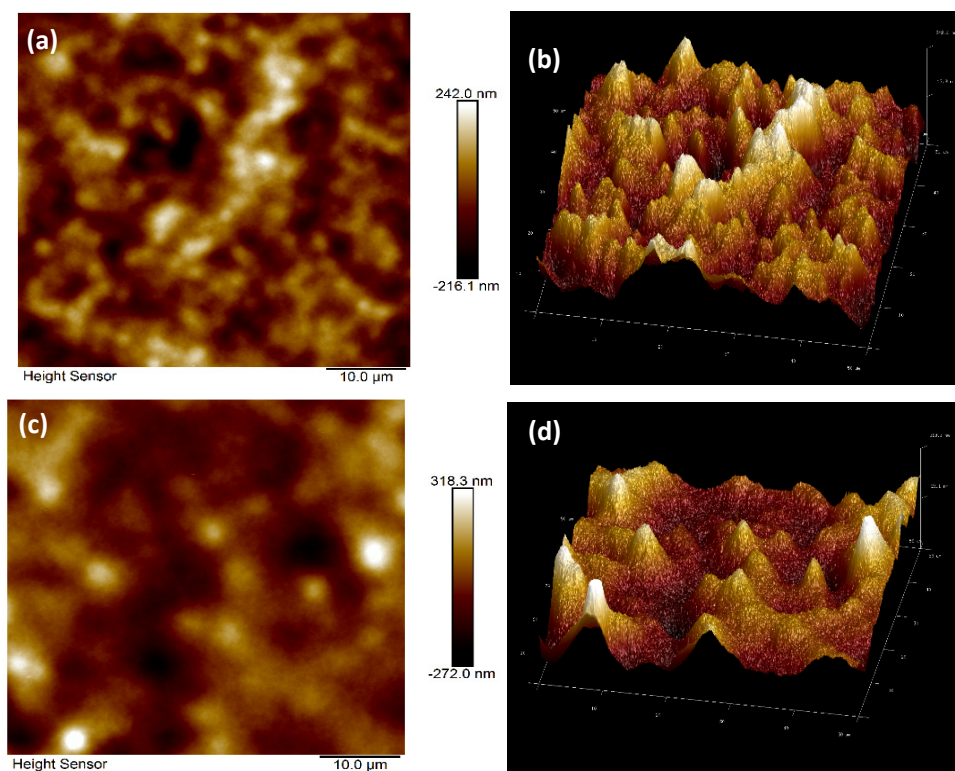

**Figure S2:** Surface Topography Analysis of GO-NH<sub>2</sub> Membranes: (a) PSf, (b) Roughness of PSf, (c) Surface of PSf-0.1-GO-NH<sub>2</sub>, and (d) Roughness of PSf-0.1-GO-NH<sub>2</sub>.
